# Supplementary material for: Superior actuation performance and healability achieved in a transparent, highly stretchable dielectric elastomer film
Source: Royal Society of Chemistry journal article supplement (doi:10.1039/d1tc02345d), 2021-01-01
Supplement: d1tc02345d1.pdf [file d1tc02345d1.pdf]

1

## Supporting information

### 2 **Superior actuation performance and healability achieved in a** 3 **transparent, highly stretchy dielectric elastomer film**

4 Run-Pan Nie, <sup>a,1</sup> Wen-Bin Tang, <sup>a,1</sup> Chao Chen, <sup>a</sup> Hua-Dong Huang, <sup>a</sup> Yue  
5 Li, <sup>a</sup> Kun Dai, <sup>b</sup> Jun Lei <sup>\*a</sup> and Zhong-Ming Li <sup>\*a</sup>

6 *<sup>a</sup> College of Polymer Science and Engineering, State Key Laboratory of*  
7 *Polymer Materials Engineering, Sichuan University, Chengdu, China*

8 *<sup>b</sup> Key Laboratory of Materials Processing and Mold (Zhengzhou*  
9 *University), Ministry of Education, School of Materials Science and*  
10 *Engineering, Zhengzhou University, Zhengzhou, China*

11 *E-mail: [leijun@scu.edu.cn](mailto:leijun@scu.edu.cn); [zmli@scu.edu.cn](mailto:zmli@scu.edu.cn)*

12 <sup>1</sup>R.P. Nie and W. B. Tang contribute equally to this work.

13

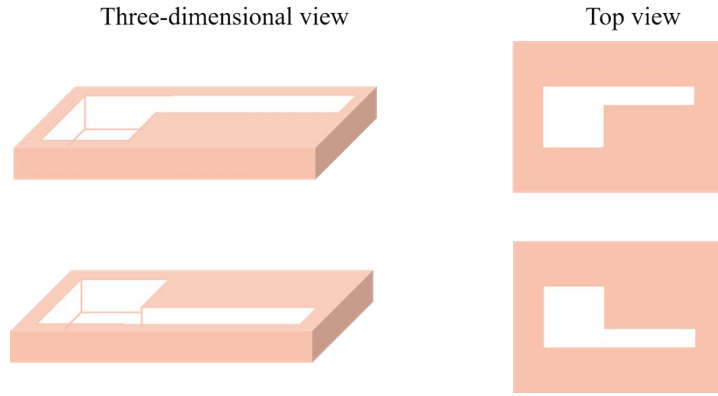

1

2

**Fig. S1** Schematic diagram of the coating mask.

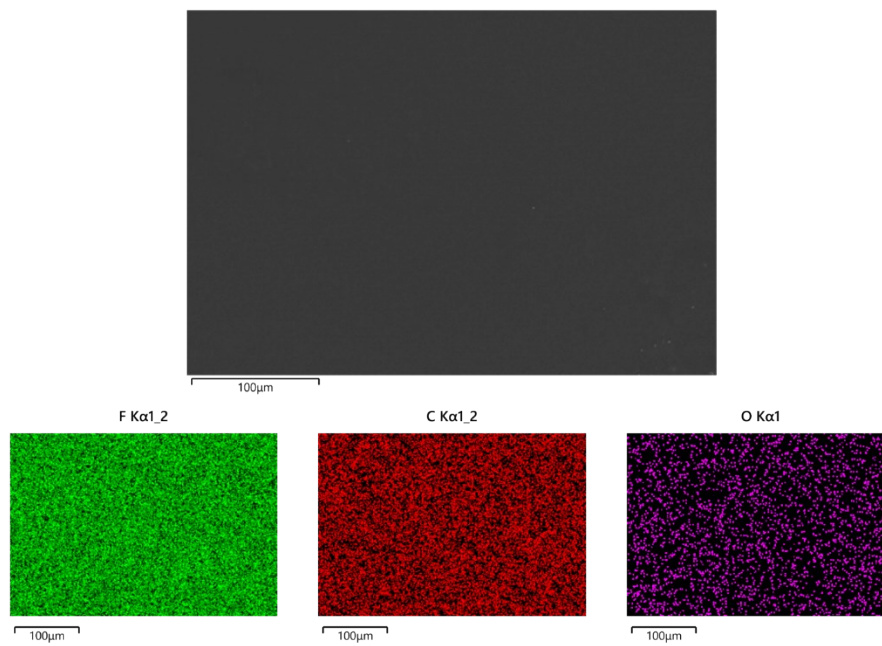

3

4

**Fig. S2** SEM image and corresponding EDS mappings of P(VDF-HFP)-15-DBP.

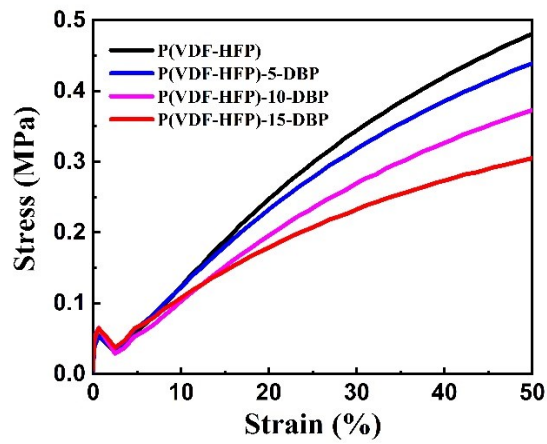

5

6

**Fig. S3** Tensile tests of the polymer materials ranging from 0% to 50%.

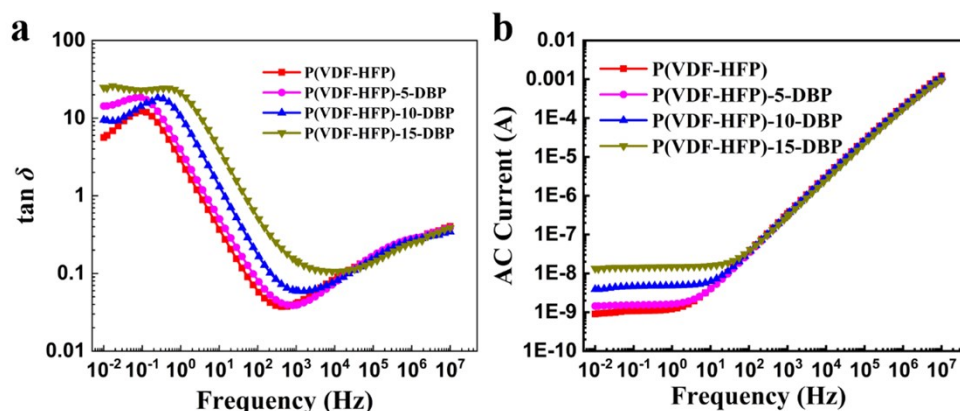

1  
2 **Fig. S4** (a)  $\tan \delta$  and (b) AC current as a function of frequency for DBP/P(VDF-HFP) films.

3 **Table S1.** Comparison of electromechanical performance between the as-prepared elastomer of this  
4 work and the state-of-the-art DE composites.

| Sample                                      | $\epsilon_r'$<br>( $10^3$ Hz) | $Y$<br>(MPa) | $\beta$<br>( $\text{MPa}^{-1}$ , $10^3$ Hz) | $E_b$<br>( $\text{MV}\cdot\text{m}^{-1}$ ) | Self-healing | Ref.             |
|---------------------------------------------|-------------------------------|--------------|---------------------------------------------|--------------------------------------------|--------------|------------------|
| M3M-SBS                                     | 7.5                           | 2.4          | 3.1                                         | 39.6                                       | YES          | [S1]             |
| Thioacetic modified PDMS (B <sub>2</sub> %) | 4.7                           | 0.12         | 39.2                                        | 16.5                                       | NO           | [S2]             |
| ec-SBAS (-2)                                | 4.8                           | 0.74         | 6.5                                         | 154                                        | NO           | [S3]             |
| DOP/mTiO <sub>2</sub> /NR (50 phr)          | 4.0                           | 0.49         | 25.5                                        | 40.0                                       | NO           | [S4]             |
| EMIMTFSI-PDMS                               | 3.7                           | 1.0          | 3.7                                         | -                                          | NO           | [S5]             |
| Fe-Hpdca-PDMS                               | 6.4                           | 0.54         | 11.9                                        | 18.8                                       | YES          | [S6]             |
| VHB 4910                                    | 4.7                           | 0.23         | 20.4                                        | 17                                         | NO           | [S7]             |
| <b>DBP/P(VDF-HFP) (10 wt%)</b>              | <b>10.9</b>                   | <b>0.9</b>   | <b>11.7</b>                                 | <b>48.2</b>                                | <b>YES</b>   | <b>This work</b> |

5 **Video S1** Actuated tests of P(VDF-HFP) under different electric fields (0, 20, 25 and 30 MV/m).

6 **Video S2** Actuated tests of P(VDF-HFP)-10-DBP under different electric fields (0, 20, 25 and 30  
7 MV/m).

## 8 References

- 9 S1 C. Ellingford, R. Zhang, A. M. Wemyss, Y. Zhang, O. B. Brown, H. Zhou, P. Keogh, C.  
10 Bowen and C. Wan, *ACS Appl. Mater. Interfaces*, 2020, **12**, 7595-7604.  
11 S2 E. Perju, Y. S. Ko, S. J. Dünki and D. M. Opris, *Mater. Des.*, 2020, **186**, 108319.  
12 S3 C. Yang, X. Gao and Y. Luo, *Chem. Eng. J.*, 2020, **382**, 123037.  
13 S4 Y. Ni, D. Yang, Q. Wei, L. Yu, J. Ai and L. Zhang, *Compos. Sci. Technol.*, 2020, **195**,  
14 108202.  
15 S5 Ankit, N. Tiwari, F. Ho, F. Krisnadi, M. R. Kulkarni, L. L. Nguyen, S. J. A. Koh and N.  
16 Mathews, *ACS Appl. Mater. Interfaces*, 2020, **12**, 37561-37570.  
17 S6 C. H. Li, C. Wang, C. Keplinger, J. L. Zuo, L. Jin, Y. Sun, P. Zheng, Y. Cao, F. Lissel, C.  
18 Linder, X. Z. You and Z. Bao, *Nat. Chem.*, 2016, **8**, 618-624.

1 S7 R.K. Sahu, K. Patra, *Mech. Adv. Mater. Struc.*, 2016, **23**, 170-179.
